# Supplementary material
Source: Springer Nature journal article supplement (https://www.springermedizin.de/resource/supplementary/13054_2012_898_MOESM5_ESM.pdf/9709288)

| Study or Subgroup                                                                                         | Omega-3 |       |            | Control |      |            | Weight        | Std. Mean Difference<br>IV, Random, 95% CI |
|-----------------------------------------------------------------------------------------------------------|---------|-------|------------|---------|------|------------|---------------|--------------------------------------------|
|                                                                                                           | Mean    | SD    | Total      | Mean    | SD   | Total      |               |                                            |
| <input checked="" type="checkbox"/> 1.10.1 ICU patients                                                   |         |       |            |         |      |            |               |                                            |
| <input checked="" type="checkbox"/> Barbosa 2010                                                          | 33.53   | 16.47 | 11         | 8.04    | 4.12 | 10         | 13.9%         | 1.99 [0.91, 3.08]                          |
| <input checked="" type="checkbox"/> Berger 2008                                                           | 30.5    | 8.2   | 12         | 4.8     | 1.7  | 12         | 12.3%         | 4.19 [2.67, 5.71]                          |
| <input checked="" type="checkbox"/> Morlion 1996                                                          | 1.89    | 0.14  | 10         | 0.46    | 0.09 | 10         | 5.1%          | 11.64 [7.52, 15.76]                        |
| <input checked="" type="checkbox"/> Wang 2008                                                             | 1.38    | 0.19  | 20         | 0.83    | 0.19 | 20         | 14.4%         | 2.84 [1.94, 3.74]                          |
| <input checked="" type="checkbox"/> Wichmann 2007                                                         | 2.08    | 0.25  | 30         | 0.85    | 0.14 | 30         | 13.4%         | 5.99 [4.77, 7.21]                          |
| <b>Subtotal (95% CI)</b>                                                                                  |         |       | <b>83</b>  |         |      | <b>82</b>  | <b>59.2%</b>  | <b>4.65 [2.70, 6.60]</b>                   |
| Heterogeneity: $\tau^2 = 4.11$ ; $\text{Chi}^2 = 41.15$ , $\text{df} = 4$ ( $P < 0.00001$ ); $I^2 = 90\%$ |         |       |            |         |      |            |               |                                            |
| Test for overall effect: $Z = 4.67$ ( $P < 0.00001$ )                                                     |         |       |            |         |      |            |               |                                            |
| <input checked="" type="checkbox"/> 1.10.2 Not ICU patients                                               |         |       |            |         |      |            |               |                                            |
| <input checked="" type="checkbox"/> Grimm 2006                                                            | 3.32    | 0.97  | 19         | 0.44    | 0.18 | 14         | 13.5%         | 3.75 [2.57, 4.94]                          |
| <input checked="" type="checkbox"/> Linseisen 2000                                                        | 2.07    | 0.33  | 17         | 0.77    | 0.2  | 16         | 12.9%         | 4.61 [3.25, 5.98]                          |
| <input checked="" type="checkbox"/> Senkal 2007                                                           | 6.99    | 2.63  | 19         | 1.35    | 0.9  | 21         | 14.4%         | 2.87 [1.96, 3.78]                          |
| <b>Subtotal (95% CI)</b>                                                                                  |         |       | <b>55</b>  |         |      | <b>51</b>  | <b>40.8%</b>  | <b>3.64 [2.65, 4.64]</b>                   |
| Heterogeneity: $\tau^2 = 0.43$ ; $\text{Chi}^2 = 4.55$ , $\text{df} = 2$ ( $P = 0.10$ ); $I^2 = 56\%$     |         |       |            |         |      |            |               |                                            |
| Test for overall effect: $Z = 7.18$ ( $P < 0.00001$ )                                                     |         |       |            |         |      |            |               |                                            |
| <b>Total (95% CI)</b>                                                                                     |         |       | <b>138</b> |         |      | <b>133</b> | <b>100.0%</b> | <b>4.12 [2.99, 5.25]</b>                   |
| Heterogeneity: $\tau^2 = 2.10$ ; $\text{Chi}^2 = 45.76$ , $\text{df} = 7$ ( $P < 0.00001$ ); $I^2 = 85\%$ |         |       |            |         |      |            |               |                                            |
| Test for overall effect: $Z = 7.13$ ( $P < 0.00001$ )                                                     |         |       |            |         |      |            |               |                                            |
| Test for subgroup differences: $\text{Chi}^2 = 0.81$ , $\text{df} = 1$ ( $P = 0.37$ ), $I^2 = 0\%$        |         |       |            |         |      |            |               |                                            |

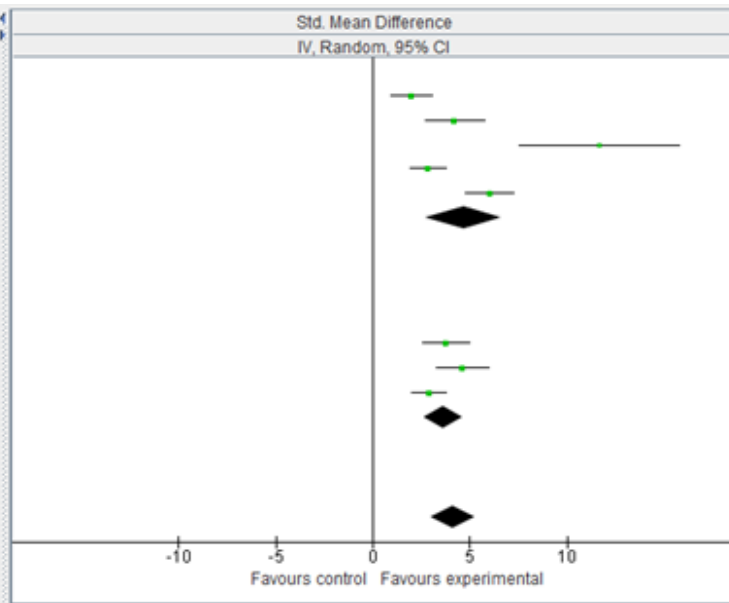

Supplement: MOESM5 [file 9709288]
